# Supplementary material for: Cost-Effectiveness of Teduglutide for Pediatric Patients with Short Bowel Syndrome in Japan, Including Caregiver Burden
Source: PubMed Central journal article supplement — Adv Ther. 2024 Oct 16;41(12):4463–75. doi: 10.1007/s12325-024-02995-7 (PMC11550222; doi:10.1007/s12325-024-02995-7), 2024-10-16
Supplement: 12325_2024_2995_MOESM1_ESM.pdf [file 12325_2024_2995_MOESM1_ESM.pdf]

Supplementary Materials

**Cost-Effectiveness of Teduglutide for Pediatric Patients with Short Bowel Syndrome in Japan, Including Caregiver Burden**

Hisato Deguchi,\* Masafumi Kato\*

\*Market Access, Public Affairs & Patient Experience, Japan Pharma Business Unit, Takeda Pharmaceutical Company Limited, Tokyo, Japan

Corresponding author:

Hisato Deguchi ([hisato.deguchi@takeda.com](mailto:hisato.deguchi@takeda.com))

Supplementary Materials

**Supplementary Table 1** Model inputs for patients

|                                                       | Base value | DSA range |       | PSA distribution | Source                                                             |
|-------------------------------------------------------|------------|-----------|-------|------------------|--------------------------------------------------------------------|
|                                                       |            | Lower     | Upper |                  |                                                                    |
| Discount rate (per year)                              |            |           |       |                  |                                                                    |
| Cost                                                  | 2%         | 0         | 4     | N/A              | Japanese guideline for preparing cost-effectiveness evaluation (1) |
| Effectiveness                                         | 2%         | 0         | 4     | N/A              | Japanese guideline for preparing cost-effectiveness evaluation (1) |
| Patient background                                    |            |           |       |                  |                                                                    |
| Mean age (years) at start of model                    | 6          | N/A       | N/A   | N/A              | TED-C14-006 (2, 3)                                                 |
| Proportion of female patients                         | 30.5%      | N/A       | N/A   | N/A              | TED-C14-006 (2, 3)                                                 |
| Proportion of patients by PS distribution at baseline |            |           |       |                  | TED-C14-006 (2, 3)                                                 |
| High PS                                               | 85.7%      | N/A       | N/A   | N/A              |                                                                    |
| Mid PS                                                | 11.4%      | N/A       | N/A   | N/A              |                                                                    |
| Low PS                                                | 2.9%       | N/A       | N/A   | N/A              |                                                                    |
| No PS                                                 | 0.0%       | N/A       | N/A   | N/A              |                                                                    |
| Transition probabilities                              |            |           |       |                  |                                                                    |
| Discontinuation at Year 2(2, 3)                       |            |           |       |                  | TED-C14-006 (2, 3)                                                 |
| No PS <sup>†</sup>                                    | 0.85       | 0.68      | 1.00  | Beta             |                                                                    |
| Low–High PS <sup>†</sup>                              | 0.85       | 0.68      | 1.00  | Beta             |                                                                    |
| Discontinuation due to nonresponse                    |            |           |       |                  | TED-C14-006 (2, 3)                                                 |
| No PS                                                 | 0.00       | N/A       | N/A   | N/A              |                                                                    |
| Low PS                                                | 0.00       | N/A       | N/A   | N/A              |                                                                    |
| Mid PS                                                | 0.00       | N/A       | N/A   | N/A              |                                                                    |
| High PS <sup>†</sup>                                  | 0.50       | 0.40      | 0.60  | Beta             |                                                                    |

## Supplementary Materials

|                                                                                |       |     |      |      |                            |
|--------------------------------------------------------------------------------|-------|-----|------|------|----------------------------|
| Prevalence of IFALD at 2 years                                                 |       |     |      |      | NICE TA804 (4)             |
| High PS                                                                        | 1.00% | N/A | N/A  | N/A  |                            |
| Mid PS                                                                         | 0.67% | N/A | N/A  | N/A  |                            |
| Low PS                                                                         | 0.33% | N/A | N/A  | N/A  |                            |
| No PS                                                                          | 0.00% | N/A | N/A  | N/A  |                            |
| Prevalence of IFALD at 6 years                                                 |       |     |      |      | NICE TA804 (4)             |
| High PS                                                                        | 2.00% | N/A | N/A  | N/A  |                            |
| Mid PS                                                                         | 1.33% | N/A | N/A  | N/A  |                            |
| Low PS                                                                         | 0.67% | N/A | N/A  | N/A  |                            |
| No PS                                                                          | 0.00% | N/A | N/A  | N/A  |                            |
| Prevalence of IFALD at 10 years                                                |       |     |      |      | NICE TA804 (4)             |
| High PS                                                                        | 3.00% | N/A | N/A  | N/A  |                            |
| Mid PS                                                                         | 2.00% | N/A | N/A  | N/A  |                            |
| Low PS                                                                         | 1.00% | N/A | N/A  | N/A  |                            |
| No PS                                                                          | 0.00% | N/A | N/A  | N/A  |                            |
| Development rates from nonprogressive liver disease to liver fibrosis (/month) |       |     |      |      | Cavicchi <i>et al.</i> (5) |
| 0–2.167 years                                                                  | 2.38% | N/A | N/A  | N/A  |                            |
| 2.167 years and above                                                          | 0.98% | N/A | N/A  | N/A  |                            |
| Development rates from liver fibrosis to cirrhosis (/month)                    |       |     |      |      | Cavicchi <i>et al.</i> (5) |
| 0–3.083 years                                                                  | 1.30% | N/A | N/A  | N/A  |                            |
| 3.083 years and above                                                          | 1.20% | N/A | N/A  | N/A  |                            |
| AE incidence (/month) (TED)                                                    |       |     |      |      | TED-C14-006 (2, 3)         |
| Abdominal pain <sup>†</sup>                                                    | 4.5%  | 3.6 | 5.4  | Beta |                            |
| Catheter site erythema <sup>†</sup>                                            | 0.6%  | 0.5 | 0.8  | Beta |                            |
| Cough <sup>†</sup>                                                             | 7.1%  | 5.6 | 8.5  | Beta |                            |
| Nasopharyngitis <sup>†</sup>                                                   | 5.8%  | 4.6 | 6.9  | Beta |                            |
| Fever <sup>†</sup>                                                             | 10.9% | 8.7 | 13.1 | Beta |                            |
| Upper respiratory tract infection <sup>†</sup>                                 | 6.4%  | 5.1 | 7.7  | Beta |                            |

## Supplementary Materials

|                                                                         |         |         |         |       |                                         |
|-------------------------------------------------------------------------|---------|---------|---------|-------|-----------------------------------------|
| Vomiting <sup>†</sup>                                                   | 10.9%   | 8.7     | 13.1    | Beta  |                                         |
| AE incidence (/month) (SOC)                                             |         |         |         |       | TED-C14-006 (2, 3)                      |
| Abdominal pain                                                          | 0.0%    | N/A     | N/A     | N/A   |                                         |
| Catheter site erythema <sup>†</sup>                                     | 3.7%    | 3.0     | 4.4     | Beta  |                                         |
| Cough <sup>†</sup>                                                      | 7.4%    | 5.9     | 8.9     | Beta  |                                         |
| Nasopharyngitis <sup>†</sup>                                            | 3.7%    | 3.0     | 4.4     | Beta  |                                         |
| Fever <sup>†</sup>                                                      | 13.0%   | 10.4    | 15.6    | Beta  |                                         |
| Upper respiratory tract infection <sup>†</sup>                          | 9.3%    | 7.4     | 11.1    | Beta  |                                         |
| Vomiting <sup>†</sup>                                                   | 13.0%   | 10.4    | 15.6    | Beta  |                                         |
| Cost                                                                    |         |         |         |       |                                         |
| Drug cost (JPY/day)                                                     | 79 300  | N/A     | N/A     | N/A   | Drug price standard(6)                  |
| Management fee for self-injection at home (JPY/time)                    | 7 500   | N/A     | N/A     | N/A   | Medical service fee point summary (7)   |
| Management fee for self-injection at home (Introduction fee) (JPY/time) | 5 800   | N/A     | N/A     | N/A   | Medical service fee point summary (7)   |
| Colonoscopy (JPY/time)                                                  | 13 375  | N/A     | N/A     | N/A   | Medical service fee point summary (7)   |
| PS cost per month by PS health state (JPY)                              |         |         |         |       | Medical resource consumption survey (8) |
| Patient aged < 18 years old                                             |         |         |         |       |                                         |
| High PS‡                                                                | 496 175 | 263 981 | 728 369 | Gamma |                                         |
| Mid PS‡                                                                 | 247 192 | 201 715 | 292 669 | Gamma |                                         |
| Low PS‡                                                                 | 196 279 | 187 125 | 205 433 | Gamma |                                         |
| No PS‡                                                                  | 90 670  | 26 879  | 154 461 | Gamma |                                         |
| Patient aged ≥ 18 years old                                             |         |         |         |       |                                         |
| High PS <sup>†</sup>                                                    | 350 339 | 280 271 | 420 407 | Gamma |                                         |
| Mid PS <sup>†</sup>                                                     | 240 299 | 192 239 | 288 359 | Gamma |                                         |
| Low PS <sup>†</sup>                                                     | 171 474 | 137 179 | 205 769 | Gamma |                                         |

Supplementary Materials

|                                                |         |        |         |       |                                                   |
|------------------------------------------------|---------|--------|---------|-------|---------------------------------------------------|
| No PS <sup>†</sup>                             | 102 981 | 82 385 | 123 577 | Gamma |                                                   |
| AE treatment cost (JPY/time)                   |         |        |         |       | Medical service fee point summary (8), assumption |
| Abdominal pain <sup>†</sup>                    | 1 775   | 1 420  | 2 130   | Gamma |                                                   |
| Catheter site erythema <sup>†</sup>            | 735     | 588    | 882     | Gamma |                                                   |
| Cough                                          | 0       | N/A    | N/A     | N/A   |                                                   |
| Nasopharyngitis                                | 0       | N/A    | N/A     | N/A   |                                                   |
| Fever <sup>†</sup>                             | 1 015   | 812    | 1 218   | Gamma |                                                   |
| Upper respiratory tract infection <sup>†</sup> | 735     | 588    | 882     | Gamma |                                                   |
| Vomiting <sup>†</sup>                          | 2 345   | 1 876  | 2 814   | Gamma |                                                   |
| IFALD treatment cost (JPY/month)               |         |        |         |       | Ikeda <i>et al.</i> (9)                           |
| Nonprogressive liver disease <sup>†</sup>      | 9 524   | 7 619  | 11 429  | Gamma |                                                   |
| Fibrosis <sup>†</sup>                          | 24 090  | 19 272 | 28 908  | Gamma |                                                   |
| Cirrhosis <sup>†</sup>                         | 38 563  | 30 850 | 46 276  | Gamma |                                                   |
| <b>Utilities</b>                               |         |        |         |       |                                                   |
| Health state utility values by PS health state |         |        |         |       | Ballinger <i>et al.</i> (10)                      |
| No PS‡                                         | 0.820   | 0.777  | 0.863   | Beta  |                                                   |
| Disutility Low PS <sup>†</sup>                 | 0.103   | 0.083  | 0.124   | Beta  |                                                   |
| Disutility Mid PS <sup>†</sup>                 | 0.275   | 0.220  | 0.330   | Beta  |                                                   |
| Disutility High PS <sup>†</sup>                | 0.435   | 0.348  | 0.522   | Beta  |                                                   |
| Utility with IFALD <sup>†</sup>                | 0.830   | 0.664  | 0.996   | Beta  | Hirao <i>et al.</i> (11)                          |
| Disutility due to AE                           |         |        |         |       |                                                   |
| Abdominal pain <sup>†</sup>                    | 0.0512  | 0.041  | 0.061   | Beta  | Sullivan <i>et al.</i> (12)                       |
| Catheter site erythema <sup>†</sup>            | 0.03    | 0.024  | 0.036   | Beta  | NICE TA352 (13)                                   |
| Cough                                          | 0       | N/A    | N/A     | N/A   | Assumption                                        |
| Nasopharyngitis                                | 0       | N/A    | N/A     | N/A   | Assumption                                        |

## Supplementary Materials

|                                                |        |      |      |      |                             |
|------------------------------------------------|--------|------|------|------|-----------------------------|
| Fever                                          | 0      | N/A  | N/A  | N/A  | Assumption,                 |
| Upper respiratory tract infection <sup>†</sup> | 0.09   | 0.07 | 0.11 | Beta | NICE CG139 (14)             |
| Vomiting <sup>†</sup>                          | 0.0512 | 0.04 | 0.06 | Beta | Sullivan <i>et al.</i> (12) |

---

<sup>†</sup>Assuming  $\pm 20\%$  for DSA and 10% of the value of the base-case analysis for PSA as SE.

<sup>‡</sup>Parameters for sensitivity analysis were set with 95% CI and SE of parameters.

AE, adverse event; CI, confidence interval; DSA, deterministic sensitivity analysis; IFALD, intestinal failure-associated liver disease; JPY, Japanese yen; N/A, not applicable; PS, parenteral support; PSA, probabilistic sensitivity analysis; SE, standard error; SOC, standard of care; TED, teduglutide.

Supplementary Materials

**Supplementary Table 2** Model inputs for caregivers

|                                                                             | Base value | DSA range          |                    | PSA distribution (parameter) | Source            |
|-----------------------------------------------------------------------------|------------|--------------------|--------------------|------------------------------|-------------------|
|                                                                             |            | Lower <sup>†</sup> | Upper <sup>†</sup> |                              |                   |
| <b>Caregiver utilities<sup>‡</sup></b>                                      |            |                    |                    |                              |                   |
| Patient aged < 18 years old                                                 |            |                    |                    |                              | UK study (15)     |
| No PS                                                                       | 1.405      | N/A                | N/A                | N/A                          |                   |
| Disutility Low PS                                                           | 0.052      | 0.041              | 0.062              | Beta                         |                   |
| Disutility Mid PS                                                           | 0.183      | 0.146              | 0.219              | Beta                         |                   |
| Disutility High PS                                                          | 0.162      | 0.129              | 0.194              | Beta                         |                   |
| Patient aged ≥ 18 years old                                                 |            |                    |                    |                              | UK study (15)     |
| No PS                                                                       | 0.749      | 0.599              | 0.899              | Beta                         |                   |
| Disutility Low PS                                                           | 0.027      | 0.022              | 0.033              | Beta                         |                   |
| Disutility Mid PS                                                           | 0.097      | 0.078              | 0.117              | Beta                         |                   |
| Disutility High PS                                                          | 0.086      | 0.069              | 0.103              | Beta                         |                   |
| <b>Caregiver utilities<sup>‡</sup> (used for scenario analyses 2 and 4)</b> |            |                    |                    |                              |                   |
| Patient aged < 18 years old                                                 |            |                    |                    |                              | Delphi panel (16) |
| No PS                                                                       | 1.405      | N/A                | N/A                | N/A                          |                   |
| Disutility Low PS                                                           | 0.155      | N/A                | N/A                | N/A                          |                   |
| Disutility Mid PS                                                           | 0.239      | N/A                | N/A                | N/A                          |                   |
| Disutility High PS                                                          | 0.464      | N/A                | N/A                | N/A                          |                   |
| Patient aged ≥ 18 years old                                                 |            |                    |                    |                              | Delphi panel (16) |
| No PS                                                                       | 0.749      | N/A                | N/A                | N/A                          |                   |
| Disutility Low PS                                                           | 0.082      | N/A                | N/A                | N/A                          |                   |
| Disutility Mid PS                                                           | 0.127      | N/A                | N/A                | N/A                          |                   |
| Disutility High PS                                                          | 0.247      | N/A                | N/A                | N/A                          |                   |
| <b>Productivity loss</b>                                                    |            |                    |                    |                              |                   |

Supplementary Materials

|                                                     |         |         |         |       |                                              |
|-----------------------------------------------------|---------|---------|---------|-------|----------------------------------------------|
| WPAI OWI (%)                                        |         |         |         |       | UK study<br>(15)                             |
| No PS                                               | 0.00%   | N/A     | N/A     | N/A   |                                              |
| Low PS                                              | 13.68%  | 10.94%  | 16.41%  | Beta  |                                              |
| Mid PS                                              | 31.08%  | 24.86%  | 37.30%  | Beta  |                                              |
| High PS                                             | 52.92%  | 42.34%  | 63.50%  | Beta  |                                              |
| WPAI AI (%)                                         |         |         |         |       | UK study<br>(15)                             |
| No PS                                               | 0.00%   | N/A     | N/A     | N/A   |                                              |
| Low PS                                              | 20.00%  | 16.00%  | 24.00%  | Beta  |                                              |
| Mid PS                                              | 53.45%  | 42.76%  | 64.13%  | Beta  |                                              |
| High PS                                             | 49.87%  | 39.89%  | 59.84%  | Beta  |                                              |
| Employment (%)                                      |         |         |         |       | Labor force<br>survey (17)                   |
| Male                                                | 91.98%  | 73.58%  | 100.00% | Beta  |                                              |
| Female                                              | 78.80%  | 63.04%  | 94.56%  | Beta  |                                              |
| Percentage of full-time employees                   |         |         |         |       | Labor force<br>survey (17)                   |
| Male                                                | 91.65%  | 73.32%  | 100.00% | Beta  |                                              |
| Female                                              | 49.86%  | 39.89%  | 59.83%  | Beta  |                                              |
| Average wages (JPY per month)                       |         |         |         |       | Basic survey<br>on wage<br>structure<br>(18) |
| Male, full-time                                     | 577 242 | 461 793 | 692 690 | Gamma |                                              |
| Male, part-time                                     | 287 225 | 229 780 | 344 670 | Gamma |                                              |
| Female, full-time                                   | 403 850 | 323 080 | 484 620 | Gamma |                                              |
| Female, part-time                                   | 219 183 | 175 347 | 263 020 | Gamma |                                              |
| Percentage of full-time female stay-at-home parents | 1.27%   | 1.02%   | 1.52%   | Beta  | Labor force<br>survey (17)                   |



## Supplementary Materials

|                                                   |         |         |         |       |                             |
|---------------------------------------------------|---------|---------|---------|-------|-----------------------------|
| Percentage of full-time male stay-at-home parents | 17.56%  | 14.05%  | 21.07%  | Beta  | Labor force survey (17)     |
| Unpaid work (JPY per month)                       |         |         |         |       | Unpaid work evaluation (19) |
| Full-time female stay-at-home parents             | 174 250 | 139 400 | 209 100 | Gamma |                             |
| Full-time male stay-at-home parents               | 307 583 | 246 067 | 369 100 | Gamma |                             |

†The DSA range of each parameter was  $\pm 20\%$ .

‡Values based on 1.5 caregivers for the patients under 18 years of age and 0.8 caregivers for patients 18 years of age and older.

AI, activity impairment; DSA, deterministic sensitivity analysis; JPY, Japanese yen; N/A, not applicable; OWI, overall work impairment; PS, parenteral support; PSA, probabilistic sensitivity analysis; WPAI, Work Productivity and Activity Impairment.

## References

1. The Central Social Insurance Medical Council. Guideline for preparing cost-effectiveness evaluation to the Central Social Insurance Medical Council (version 3). 2022. Accessed 21 Feb 2023. Available from: [https://c2h.niph.go.jp/tools/guideline/guideline\\_en.pdf](https://c2h.niph.go.jp/tools/guideline/guideline_en.pdf).
2. Kocoshis SA, Merritt RJ, Hill S, Protheroe S, Carter BA, Horslen S, et al. Safety and efficacy of teduglutide in pediatric patients with intestinal failure due to short bowel syndrome: a 24-week, phase III study. *JPEN J Parenter Enteral Nutr.* 2020;44(4):621–31.
3. Takeda Pharmaceutical Company Ltd. Summary of Product Characteristics, Revestive. Pharmaceuticals and Medical Devices Agency. 2017. Accessed 21 Feb 2023. Available from: <https://www.pmda.go.jp/drugs/2021/P20210614001/index.html>.
4. National Institute for Health and Care Excellence. Teduglutide for treating short bowel syndrome technology appraisal guidance [TA804]. 2022. Accessed 21 Feb 2023. Available from: <https://www.nice.org.uk/guidance/ta804>.

## Supplementary Materials

5. Cavicchi M, Beau P, Crenn P, Degott C, Messing B. Prevalence of liver disease and contributing factors in patients receiving home parenteral nutrition for permanent intestinal failure. *Ann Intern Med.* 2000;132(7):525–32.
6. Ministry of Health, Labour and Welfare. List of drug price standard covered items and information on generic drugs (until 31 Mar 2022). 2022. Accessed 21 Feb 2023. Available from: <https://www.mhlw.go.jp/topics/2021/04/tp20210401-01.html>.
7. Medical Fee Point Summary April 2020/21 Revised Edition [Medical]: Igaku Tsushinsha. 2021.
8. Takeda Pharmaceutical Company Ltd. Cost-effectiveness evaluation of teduglutide, medical resource consumption survey - brief report (data on file). 4 February 2022.
9. Ikeda T, Kobayashi M, Shimoda S. Various measures related to viral liver disease: Research on health economic evaluation of 2011–2015. Comprehensive report. 2013. Accessed 21 Feb 2023. Available from: <https://mhlw-grants.niph.go.jp/system/files/2013/135013/201333004A/201333004A0007.pdf>.
10. Ballinger R, Macey J, Lloyd A, Brazier J, Ablett J, Burden S, et al. Measurement of utilities associated with parenteral support requirement in patients with short bowel syndrome and intestinal failure. *Clin Ther.* 2018;40(11):1878–93 e1.
11. Hirao T, Yatsuhashi H, Ikeda T, Yoda K. Estimating the utility value of viral hepatitis-related diseases using EQ-5D. Research on medical economic evaluation of various countermeasures related to viral liver disease collaborative research report. Accessed 21 Feb 2023. Available from: <https://mhlw-grants.niph.go.jp/system/files/2012/125013/201240004A/201240004A0006.pdf>.
12. Sullivan PW, Slejko JF, Sculpher MJ, Ghushchyan V. Catalogue of EQ-5D scores for the United Kingdom. *Med Decis Making.* 2011;31(6):800–4.
13. National Institute for Health and Care Excellence. Vedolizumab for treating moderately to severely active Crohn's disease after prior therapy: technology appraisal guidance [TA352]. 2015. Accessed 21 Feb 2023. Available from: <https://www.nice.org.uk/guidance/ta352>
14. National Institute for Health and Care Excellence. Clinical guideline [CG139]: healthcare-associated infections: prevention and control in primary and community care 2012. 2012. Accessed 22 Feb 2023. Available from: <https://www.nice.org.uk/guidance/cg139>.
15. Shire. Impacts on carers of patients with short bowel syndrome-associated intestinal failure receiving parenteral support - study report (data on file). 22 June 2017.
16. Shire. Teduglutide (Revestive®) for short bowel syndrome (SBS) in paediatric patients: cost-effectiveness model - technical report (data on file). 29 May 2019.
17. Ministry of Internal Affairs and Communications. Labour Force Survey. Accessed 21 Feb 2023. Available from: <https://www.e-stat.go.jp/stat-search/files?page=1&toukei=00200531&tstat=000000110001>.

## Supplementary Materials

18. Ministry of Health, Labour and Welfare. Basic survey on wage structure. Accessed 21 Feb 2023. Available from: <https://www.e-stat.go.jp/stat-search/files?page=1&toukei=00450091&tstat=>.
19. Cabinet Office, National Institute of Economic and Social Research. Monetary evaluation of unpaid labor. 2018. Accessed 21 Feb 2023. Available from: [https://www.esri.cao.go.jp/jp/sna/sonota/satellite/roudou/contents/kajikatsudou\\_181213.html](https://www.esri.cao.go.jp/jp/sna/sonota/satellite/roudou/contents/kajikatsudou_181213.html).
